# Supplementary material for: Association of serum neurofilament light with microglial activation in multiple sclerosis
Source: HighWire-hosted journal article supplement (doi:10.1136/jnnp-2023-331051), 2023-05-02

**Saraste M et al. Supplemental material****eTable 1.** Results of the linear regression modelling exploring the association between serum NfL and TSPO-PET related, demographical and clinical parameters among brain DVR(high) patients (n = 19).

| <b>Univariate models</b>                      |                 |                |                           |                              |                  |
|-----------------------------------------------|-----------------|----------------|---------------------------|------------------------------|------------------|
| <b>Studied variable</b>                       | <b>Estimate</b> | <b>95 % CI</b> | <b>Unadjusted p-value</b> | <b>FDR-corrected p-value</b> | <b>R-squared</b> |
| NAWM DVR                                      | 0.40            | 0.03 - 0.77    | 0.036                     | 0.069                        | 23 %             |
| Perilesional NAWM DVR                         | 0.48            | 0.14 - 0.83    | <b>0.009</b>              | 0.039                        | 34 %             |
| Lesion rim DVR                                | 0.49            | 0.15 - 0.83    | <b>0.008</b>              | 0.039                        | 35 %             |
| T1 DVR                                        | 0.41            | 0.04 - 0.78    | 0.034                     | 0.069                        | 24 %             |
| Number of rim-active lesions <sup>a</sup>     | 0.46            | 0.10 - 0.81    | <b>0.008</b>              | 0.039                        | 30 %             |
| Number of overall-active lesions <sup>a</sup> | 0.47            | 0.12 - 0.82    | <b>0.011</b>              | 0.039                        | 33 %             |
| Volume of rim-active lesions <sup>b</sup>     | 0.50            | 0.17 - 0.84    | <b>0.006</b>              | 0.039                        | 37 %             |
| Volume of overall-active lesions <sup>b</sup> | 0.41            | 0.05 - 0.78    | 0.030                     | 0.069                        | 25 %             |
| BMI                                           | -0.43           | -0.79 - -0.07  | 0.022                     | 0.058                        | 27 %             |
| Annualized relapse rate                       | -0.14           | -0.56 - 0.28   | 0.5                       | 0.6                          | 3 %              |
| Time since last relapse                       | 0.33            | -0.06-0.72     | 0.092                     | 0.15                         | 16 %             |
| EDSS                                          | 0.44            | 0.07 - 0.80    | 0.021                     | 0.058                        | 28 %             |
| MSSS                                          | 0.24            | -0.16 - 0.65   | 0.2                       | 0.3                          | 7 %              |
| Disease duration                              | 0.15            | -0.27 - 0.57   | 0.5                       | 0.6                          | 3 %              |
| Age                                           | -0.20           | -0.61 - 0.21   | 0.3                       | 0.4                          | 6 %              |
| T1 lesion load                                | 0.47            | 0.12 - 0.82    | <b>0.011</b>              | 0.039                        | 32 %             |
| NAWM volume                                   | -0.18           | -0.60 - 0.23   | 0.4                       | 0.5                          | 5 %              |
| Cortical GM volume                            | 0.01            | -0.42 - 0.43   | 1                         | 1                            | 0.006 %          |
| DMT: Yes vs. No                               | -0.52           | -1.14 - 0.09   | 0.091                     | 0.15                         | 16 %             |
| Male vs. female                               | -0.05           | -0.48 - 0.38   | 0.8                       | 0.8                          | 0.4 %            |
| SPMS vs. RRMS                                 | 0.19            | -0.36 - 0.75   | 0.5                       | 0.6                          | 3 %              |
| <b>Multivariate stepwise model</b>            |                 |                |                           |                              |                  |
| <b>Variables in the final model</b>           | <b>Estimate</b> | <b>95 % CI</b> | <b>p-value</b>            |                              | <b>R-squared</b> |
| Volume of rim-active lesions <sup>b</sup>     | 0.51            | 0.20 - 0.81    | 0.003                     |                              | 53 %             |
| DMT: Yes vs. No                               | -0.53           | -1.01 - 0.05   | 0.032                     |                              |                  |

The p-values of univariate models were corrected using false discovery rate (FDR) method for the number of investigated variables (n = 21). The significance of bolded p-values were sustained in FDR correction. The building of multivariate stepwise linear regression model started with a model without any predictors, and in each step the most suitable variable according to Bayesian information criterion was added to the model. All variables used in univariate models were considered. The p-values of final multivariate stepwise model were not corrected using FDR. ARR = annualized relapse rate between disease and study onset, BMI = body mass index, DMT = disease modifying treatment, DVR = distribution volume ratio (represents specific

binding of [ $^{11}\text{C}$ ]PK11195), EDSS = expanded disability status scale, GM = grey matter, MSSS = multiple sclerosis status scale, NAWM = normal appearing white matter, RRMS = relapsing remitting multiple sclerosis, SPMS = secondary progressive multiple sclerosis

<sup>a</sup> Predictor added as  $\log(\text{number} + 1)$  due to model assumptions <sup>b</sup> Predictor added as  $\log(\text{volume} + 0.01)$  due to model assumptions

**eFigure 1. Illustration of region of interests (ROI) used in the study**

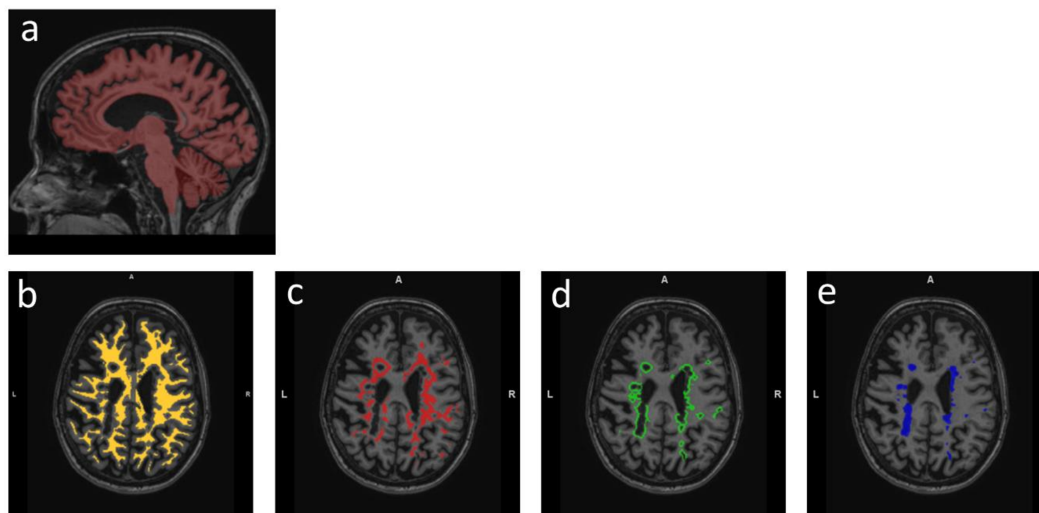

The 3 T MR-images are from an adult patient with RRMS. (a) Sagittal view of 3DT1 with overlaid brain ROI including cerebrum, cerebellum and brain stem. (b - e) Axial views of respective MRI with overlaid ROIs of normal appearing white matter (yellow, b), perilesional NAWM (red, c), lesion rim (green, d) and T1 hypo intense lesions (blue, e).

**eFigure 2. Pearson correlation between brain DVR and DVRs in the other studied region of interests in the whole study cohort (n = 44).**

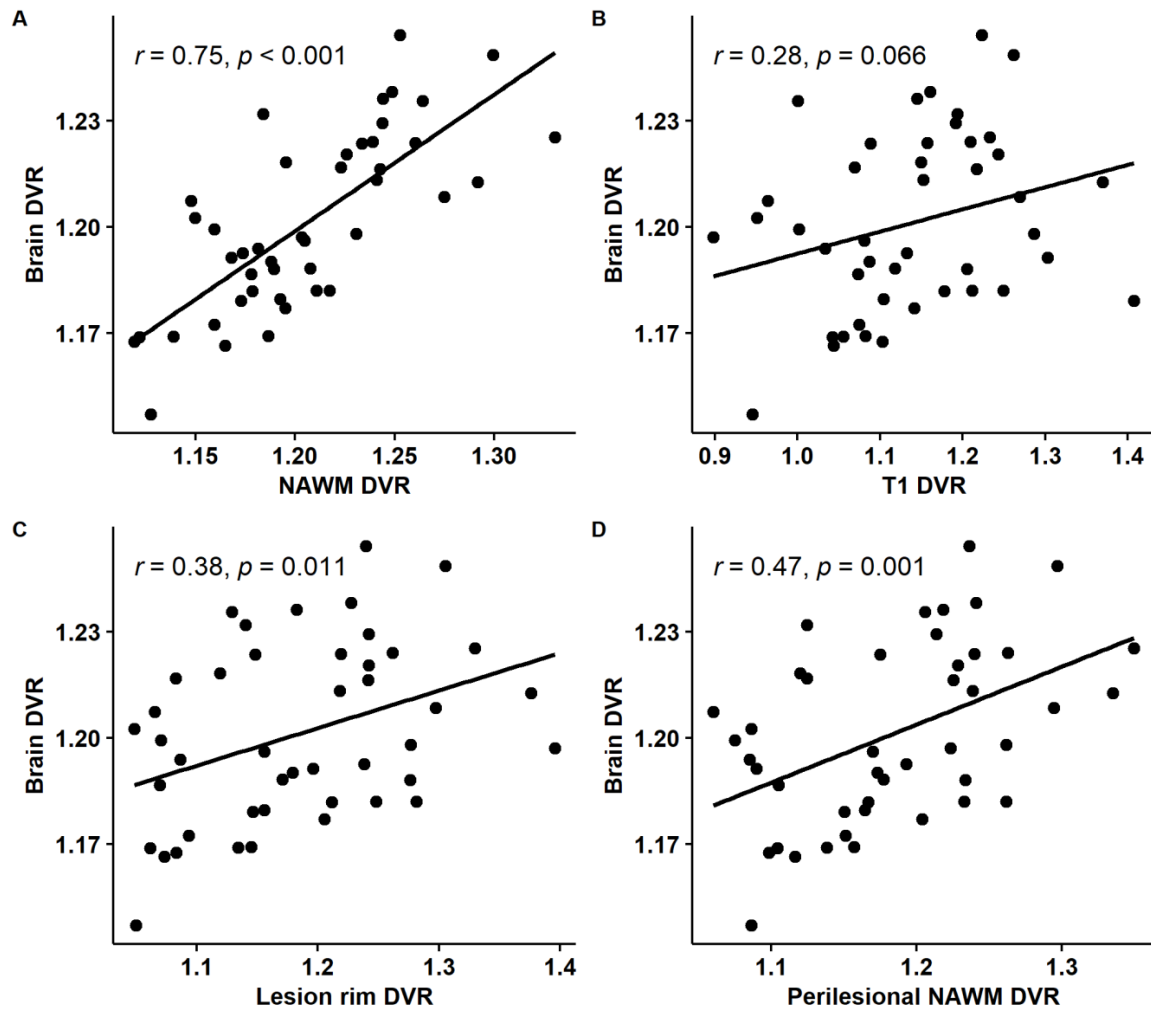

**eFigure 3. Spearman correlations between serum NfL and proportion of T1 hypointense lesions containing activated microglia (active lesions) and inactive lesions among MS patients having increased innate immune cell activation within the brain (n =19).**

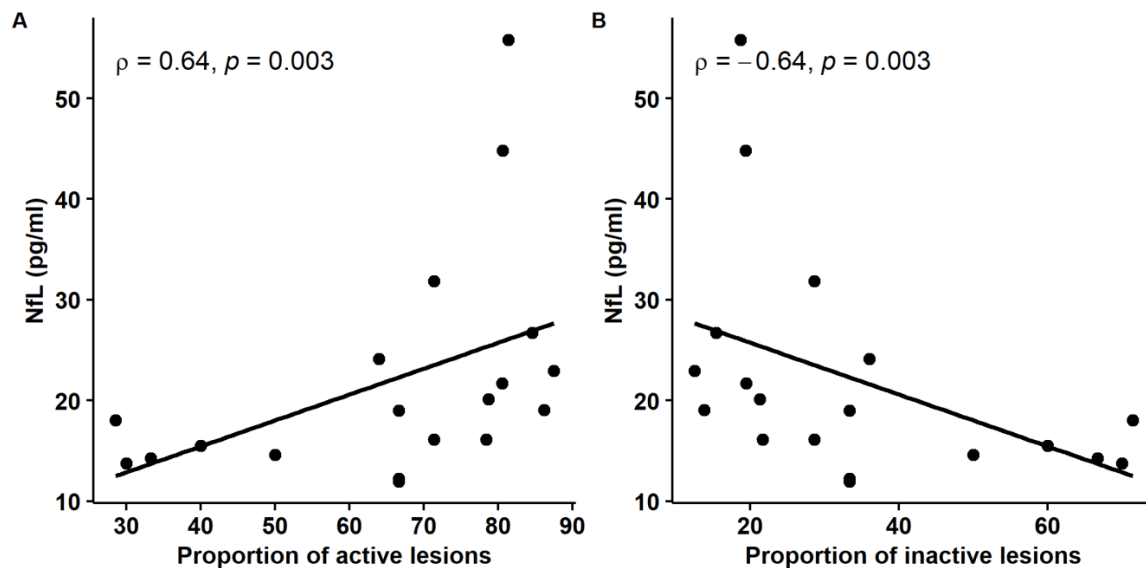

The separation of active and inactive lesions is based on the proportion of specific [ $^{11}\text{C}$ ]PK11195 binding within the lesion rim and core. Increased serum NfL correlated with both a higher proportion of lesions containing activated microglia (A) and a lower proportion of inactive lesions (B).

**eFigure 4. Spearman correlations between serum NfL and number and volume of T1 hypointense lesions containing activated microglia among MS patients having increased innate immune cell activation within the brain (n =19).**

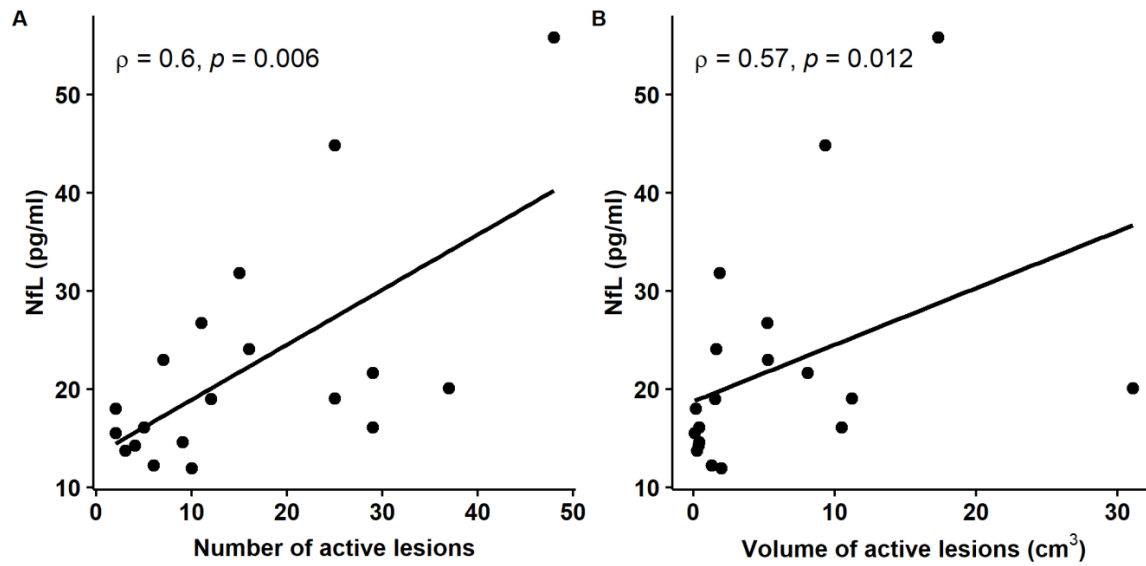

Supplement: jnnp-2023-331051supp001_data_supplement.pdf [file jnnp-2023-331051supp001_data_supplement.pdf]
